---

---

## EDITORS

---

**Deborah J. Hales, M.D.**  
Arlington, Virginia

**Mark Hyman Rapaport, M.D.**  
Los Angeles, California

## PATIENT MANAGEMENT EXERCISE

**Ian A. Cook, M.D.**  
Los Angeles, California

---

---

## SENIOR ADVISORY BOARD

---

**Carol A. Bernstein, M.D.**  
New York, New York

**Paula J. Clayton, M.D.**  
New York, New York

**Pedro L. Delgado, M.D.**  
San Antonio, Texas

**Howard H. Goldman, M.D.**  
Potomac, Maryland

**Ira M. Lesser, M.D.**  
Torrance, California

**Charles F. Reynolds III, M.D.**  
Pittsburgh, Pennsylvania

**Pedro Ruiz, M.D.**  
Houston, Texas

**Altha J. Stewart, M.D.**  
Philadelphia, Pennsylvania

**Stephen C. Scheiber, M.D.**  
Glenview, Illinois

**Daniel K. Winstead, M.D.**  
New Orleans, Louisiana

**Joel Yager, M.D.**  
Denver, Colorado

---

---

## EDITORIAL BOARD

---

**Joseph A. Cheong, M.D.**  
Gainesville, Florida

**Laura Dunn, M.D.**  
San Diego, California

**John B. Herman, M.D.**  
Boston, Massachusetts

**Donald M. Hilty, M.D.**  
Sacramento, California

**Geetha Jayaram, M.D., M.B.A.**  
Baltimore, Maryland

**Thomas A.M. Kramer, M.D.**  
Northbrook, Illinois

**Daryl Matthews, M.D.**  
Honolulu, Hawaii

**Cheryl F. McCartney, M.D.**  
Chapel Hill, North Carolina

**Philip R. Muskin, M.D.**  
New York, New York

**Michele T. Pato, M.D.**  
Los Angeles, California

**Cynthia W. Santos, M.D.**  
Houston, Texas

**Deborah Spitz, M.D.**  
Chicago, Illinois

**James W. Thompson, M.D., M.P.H.**  
Glen Cove, New York

**Joyce A. Tinsley, M.D.**  
Farmington, Connecticut

**Owen M. Wolkowitz, M.D.**  
San Francisco, California



**FOCUS**  
THE JOURNAL OF LIFELONG LEARNING IN PSYCHIATRY

FOCUS, A Journal of the American Psychiatric Association published by American Psychiatric Publishing, Inc.  
ISSN 1541-4094. Printed in the United States.

Published quarterly. Periodicals postage paid at Arlington, VA, and additional mailing offices. POSTMASTER: Send address changes to FOCUS, Circulation Department, American Psychiatric Publishing, Inc., 1000 Wilson Blvd., Suite 1825, Arlington, VA 22209-3901.

### Subscriptions

U.S. APA member \$296.00, U.S. non-member \$476.00, student \$96.00 (electronic only), Canada and foreign APA member \$355.00, Canada and international non-member \$552.00; (703) 907-7300 or (800) 368-5777.

### Officers of the Association

Alan F. Schatzberg, M.D., *President*  
Carol A. Bernstein, M.D., *President-Elect*  
Jeffrey L. Geller, M.D., M.P.H., *Vice-President*  
David Fassler, M.D., *Secretary-Treasurer*  
Gary S. Weinstein, M.D., *Speaker of the Assembly*  
James Scully, M.D., *Medical Director*

### Editorial Offices

Telephone: (703) 907-8637, Fax: (703) 907-7849  
Journal Web site: [focus.psychiatryonline.org](http://focus.psychiatryonline.org)  
CME Web site: [cme.psychiatryonline.org](http://cme.psychiatryonline.org)

### Change of Address and Assistance With Online Subscriptions

Call Circulation at (703) 907-7300 or (800) 368-5777 or send an email to [accessnumber@psych.org](mailto:accessnumber@psych.org)

### CME

Telephone: (703) 907-8637, Fax: (703) 907-7849

### Subscriber Number

FOCUS subscriber numbers are printed on the FOCUS label above your name. Call (800) 368-5777 for assistance in identifying your subscriber number.

Copyright © 2009, American Psychiatric Association.

Criteria sets reprinted from Diagnostic and Statistical Manual of Mental Disorders, 4th Edition, Text Revision. Copyright © 2000, American Psychiatric Association. Used with permission.

MANAGING EDITOR

Michael D. Roy

American Psychiatric Association  
Division of Continuing Medical Education

ASSOCIATE DIRECTOR, FOCUS

Kristen Moeller

**FOCUS :**  
**the Journal of Lifelong Learning in Psychiatry**

**EDUCATIONAL OBJECTIVES**

FOCUS, the APA continuing medical education journal, is designed as a personal study resource to help practicing psychiatrists keep abreast of significant advances in the field, with particular attention to clinical practice.

Participants review current knowledge, recognize gaps in learning, and increase their understanding of an important topic in the field of psychiatry.

Participants prepare for an annual self-assessment designed to aid the physician in addressing areas where more study is needed to enhance management of patients.

**TO EARN CME CREDIT**

Each issue, prepared by distinguished faculty who are recognized leaders in their fields, incorporates a CME component. To earn CME credit for FOCUS, subscribers should read through the material presented in each issue. After reading the material, complete the CME Quiz and submit the evaluation and study hours to APA; or complete the Quiz and evaluation online at [focus.psychiatryonline.org](http://focus.psychiatryonline.org).

**ACCREDITATION AND DESIGNATION**

The American Psychiatric Association is accredited by the Accreditation Council for Continuing Medical Education to provide continuing medical education for physicians.

The APA designates this educational activity for a maximum of 5 AMA PRA Category 1 credits. Physicians should only claim credit commensurate with the extent of their participation in the activity.

Neither the American Psychiatric Association nor American Psychiatric Publishing, Inc., holds itself responsible for statements made in its publications by contributors. Unless so stated, material in FOCUS does not reflect the endorsement, official attitude, or position of the American Psychiatric Association, American Psychiatric Publishing, Inc., or the Journal's Editorial Board.

Authorization to photocopy items for internal or personal use, or the internal or personal use of specific clients, is granted for libraries and other users registered with the Copyright Clearance Center (CCC) Transactional Reporting Service, provided that the base fee of \$15.00 per copy is paid directly to CCC, 222 Rosewood Drive, Danvers, MA 01923; (978) 750-8400 (tel), (978) 646-8600 (fax), [www.copyright.com](http://www.copyright.com) (Web site). 0002-953X/03/\$15.00.

This consent does not extend to other kinds of copying, such as copying for general distribution, for advertising or promotional purposes, for creating new collective works, or for resale. Permission need not be obtained for photocopying isolated articles for non-profit classroom or library reserve use; all fees associated with such permission are waived.

*Mission Statement*  
*Lifelong Learning in Psychiatry*

An evolving series of educational initiatives developed by the American Psychiatric Association to meet the changing needs of psychiatrists for the 21st century.

*FOCUS*

The APA continuing education journal is designed for practicing psychiatrists to keep abreast of significant advances in the field, while developing self-directed lifelong learning skills. The goal of *FOCUS* is the lively interactive dissemination of up-to-date information for practicing psychiatrists, facilitating lifelong study skills and critical self-assessment in order to improve patient care.

**The American Board of Psychiatry and Neurology** has reviewed *FOCUS: The Journal of Lifelong Learning in Psychiatry* and the *FOCUS Self-Assessment Examination* and has approved this program as part of a comprehensive lifelong learning and self-assessment program, which is mandated by the American Board of Medical Specialties as a necessary component of maintenance of certification.

**Royal College of Physicians and Surgeons of Canada**

The Focus Self Assessment program is accredited for up to 20 hours of continuing professional development per year under Section 3 of the Maintenance of Certification program of the Royal College of Physicians and Surgeons of Canada.

---

**AMERICAN PSYCHIATRIC PUBLISHING, INC.**  
**BOARD OF DIRECTORS**

*President and Chair*

Laura Weiss Roberts, M.D.

*Secretary*

Donna M. Norris, M.D.

*Treasurer*

Joan A. Lang, M.D.

John M. Oldham, M.D.

Katharine Phillips, M.D.

Pedro Ruiz, M.D.

Donna E. Stewart, M.D., F.R.C.P.(C.)

Amy Ursano, M.D.

**EX-OFFICIO MEMBERS**

*APA President*

Alan F. Schatzberg, M.D.

*APA President-Elect*

Carol A. Bernstein, M.D.

*APA Secretary-Treasurer*

David Fassler, M.D.

*APA Medical Director*

James Scully, M.D.

*Editor-in-Chief, The American Journal of Psychiatry*

Robert Freedman, M.D.

*Editor-in-Chief, Books*

Robert E. Hales, M.D., M.B.A.

*Chief Executive Officer*

Ronald E. McMillen
