# FOCUS

THE JOURNAL OF LIFELONG LEARNING IN PSYCHIATRY



## *Psychosomatic Medicine*

*Guest Editor, José R. Maldonado, M.D.*

### IN CLINICAL SYNTHESIS:

Psychiatric Aspects of  
HIV Spectrum Disease

*Karl Goodkin, M.D., Ph.D.*

Psychiatric Involvement  
in Obesity Treatment

*Alicia R. Ruelaz, M.D.*

Psycho-Oncology: A Review for  
the General Psychiatrist

*Fremonta Meyer, M.D.*

*Matthew Ehrlich, M.D.*

*John Peteet, M.D.*

AND INFLUENTIAL PUBLICATIONS . . .
